# Supplementary material
Source: HighWire-hosted journal article supplement (https://srh.bmj.com/content/bmjsrh-2018-200090)
Supplement: inline-supplementary-material-1 [file inline-supplementary-material-1.pdf]

Please choose which service you need today by ticking the most appropriate box. This assessment will direct you to the most appropriate member of staff who can meet your needs today.

|                                                                                                                                                               |  |
|---------------------------------------------------------------------------------------------------------------------------------------------------------------|--|
| <b>SERVICES</b>                                                                                                                                               |  |
| I have been told I have an infection by a partner or Health Advisor                                                                                           |  |
| I have had a Needle stick injury                                                                                                                              |  |
| I want to talk about PrEP / I am on a PrEP trial                                                                                                              |  |
| I need / due for a Hepatitis B Injection                                                                                                                      |  |
| I have erection problems - Your GP should be your first contact                                                                                               |  |
| <b>I HAVE SYMPTOMS/PROBLEMS OR INFECTION</b>                                                                                                                  |  |
| I have been sexually assaulted (raped)                                                                                                                        |  |
| I think I need HIV prevention medication (PEPSE)                                                                                                              |  |
| I have started HIV prevention medication and am here for my review                                                                                            |  |
| I have pain or discharge or blood from my bottom                                                                                                              |  |
| I have a lump or pain in my groin or testicles                                                                                                                |  |
| I have herpes ulcers                                                                                                                                          |  |
| I have a body or genital rash or an ulcer on my penis / vagina / mouth area                                                                                   |  |
| I have lower abdominal pain and have a contraceptive coil                                                                                                     |  |
|                                                                                                                                                               |  |
| I have a discharge or blood from my vagina / penis or semen, itching or spots                                                                                 |  |
| I have pain or blood when passing urine                                                                                                                       |  |
| I have a retained tampon / condom                                                                                                                             |  |
| I have warts / healing herpes ulcers, skin tags or small unknown skin lumps                                                                                   |  |
| <b>CONTRACEPTION</b>                                                                                                                                          |  |
| I need emergency contraception (morning after pill)                                                                                                           |  |
| I would like to discuss contraception methods or have a problem with it                                                                                       |  |
| I would like to start the pill, patch or contraception injection                                                                                              |  |
| I am on the pill / patch and would like some more                                                                                                             |  |
| I am on the Depo Injection and am due another                                                                                                                 |  |
| I am due my Smear Test ( Pap Test, Cytology)                                                                                                                  |  |
|                                                                                                                                                               |  |
| I would like a contraceptive coil fitted                                                                                                                      |  |
| I have a problem with my contraceptive coil (No abdominal pain)                                                                                               |  |
| I would like a contraceptive coil removed                                                                                                                     |  |
| I would like a contraceptive coil removed and refitted                                                                                                        |  |
| I would like a contraceptive implant fitted                                                                                                                   |  |
| I have a problem with my contraceptive implant                                                                                                                |  |
| I would like a contraceptive implant removed                                                                                                                  |  |
| I would like contraceptive implant removed and refitted                                                                                                       |  |
| <b>I HAVE NO SYMPTOMS/PROBLEMS</b>                                                                                                                            |  |
| I would like a sexual health test.<br><b>If you have chosen Screen &amp; Go you can only use this service if you have no symptoms or concerns whatsoever.</b> |  |
| I need a pregnancy test                                                                                                                                       |  |
| I am pregnant and need some advice                                                                                                                            |  |
| I have been advised to have a repeat blood test                                                                                                               |  |
